# Supplementary material for: Adducins Regulate Remodeling of Apical Junctions in Human Epithelial Cells
Source: PubMed Central journal article supplement — Mol Biol Cell. 2010 Oct 15;21(20):3506–17. doi: 10.1091/mbc.E10-03-0259 (PMC2954116; doi:10.1091/mbc.e10-03-0259), 2010-10-15

## Supplemental Figure Legends

**Supplemental Figure 1 Downregulation of adducin expression does not affect development of the paracellular barrier.** SK-CO15 cells were transfected with either control,  $\alpha$ -adducin or  $\gamma$ -adducin-specific siRNAs and development of the paracellular barrier was monitored by TEER measurements. Note that depletion of  $\alpha$  or  $\gamma$  adducins has no effect on the barrier formation compared to control SK-CO15 cells.

**Supplemental Figure 2. Downregulation of  $\alpha$ -adducin expression does not affect AJ and TJ in confluent cell monolayers.** SK-CO15 cells were transfected with either control or  $\alpha$ -adducin-specific siRNAs and the integrity of their AJ and TJ was examined by immunolabeling and confocal microscopy on day 4 post-transfection. Note that depletion of  $\alpha$ -adducin has no effect on the integrity of epithelial junctions in confluent epithelial cell monolayers. Bar, 10  $\mu$ m.

**Supplemental Figure 3. Downregulation of  $\gamma$ -adducin expression does not affect AJ and TJ in confluent cell monolayers.** SK-CO15 cells were transfected with either control or  $\gamma$ -adducin-specific siRNAs and the integrity of their AJ and TJ was examined by immunolabeling and confocal microscopy on day 4 post-transfection. Note that depletion of  $\gamma$ -adducin has no effect on the integrity of apical junctions in confluent epithelial cell monolayers. Bar, 10  $\mu$ m.

**Supplemental Figure 4. Downregulation of  $\alpha$  and  $\gamma$  adducin expression does not induce collapse of the lateral plasma membrane.** (A) Representative xz images and (B) image quantification show that siRNA-mediated depletion of  $\alpha$ -adducin does not effect the average height in confluent SK-CO15 cell monolayers, whereas  $\gamma$ -adducin depletion induces just a small (< 10%) decrease in the cell height. \*p < 0.05 compared to control siRNA-treated cells (n = 20).

**Supplemental Figure 5. siRNA-mediated depletion of  $\alpha$ -adducin attenuates post-EGF reassembly of AJ.** Serum-starved control and  $\alpha$ -adducin-depleted A549 cells were exposed to EGF for 24 h followed by additional 24 h post-EGF recovery in a complete medium. Immunofluorescence labeling and confocal microscopy show reversible disassembly of  $\beta$ -catenin based AJ by the EGF treatment and complete restoration of AJ in control cells after EGF removal (arrows). This AJ recovery is attenuated in  $\alpha$ -adducin-depleted A549 cells (arrowheads). Bar, 10  $\mu$ m.

**Supplemental Figure 6. Downregulation of  $\alpha$  and  $\gamma$  adducins does not affect mRNA level of  $\beta$ II-spectrin.** A Real time RT-PCR analysis presented as individual amplification graphs (A) and the calculated normalized delta threshold cycle number (B), demonstrates that siRNA-mediated downregulation of  $\alpha$  and  $\gamma$  adducins in SK-CO15 cells does not alter mRNA expression of  $\beta$ II-spectrin.

**Supplemental Figure 7. Downregulation of  $\gamma$ -adducin does not affect organization of the perijunctional F-actin belt in stationary epithelial cells.** SK-CO15 cells were transfected with either control or  $\alpha$ -adducin-specific siRNAs and the integrity of their junction-associated actin cytoskeleton was examined by fluorescence labeling and confocal microscopy on day 4 post-transfection. Note normal organization of the perijunctional F-actin belt in confluent control and  $\alpha$ -adducin depleted cell monolayers (arrows). Bar, 20  $\mu$ m.

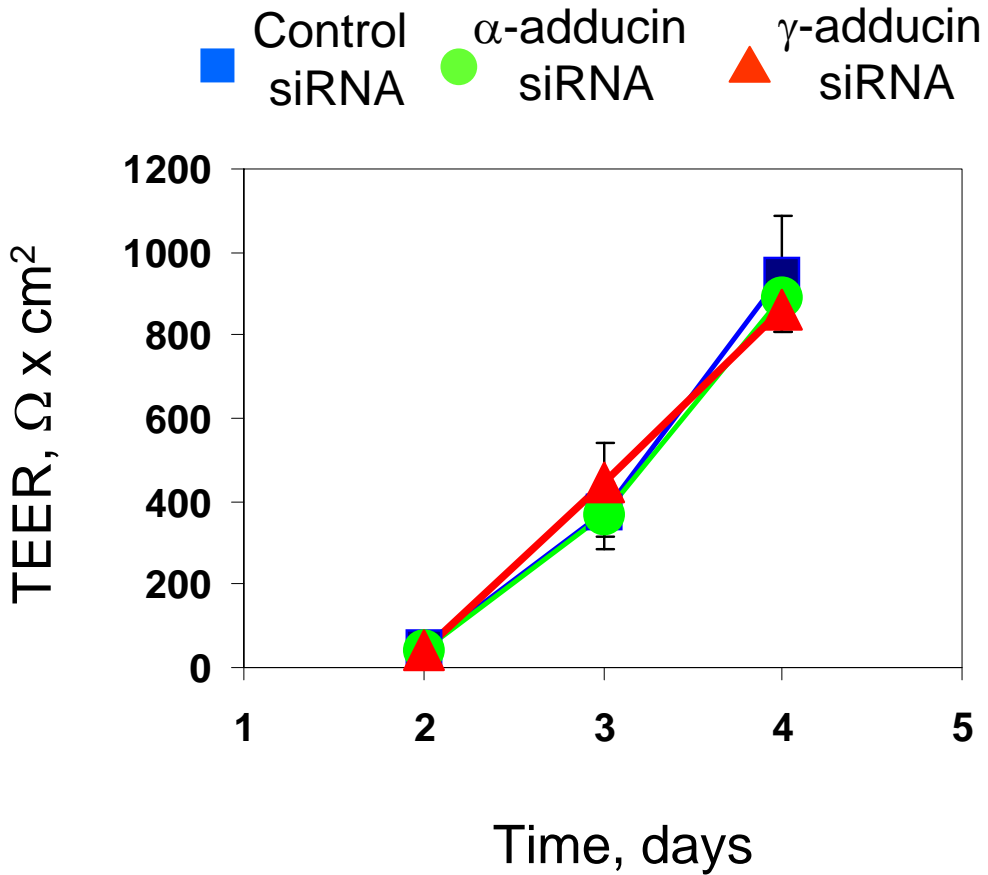

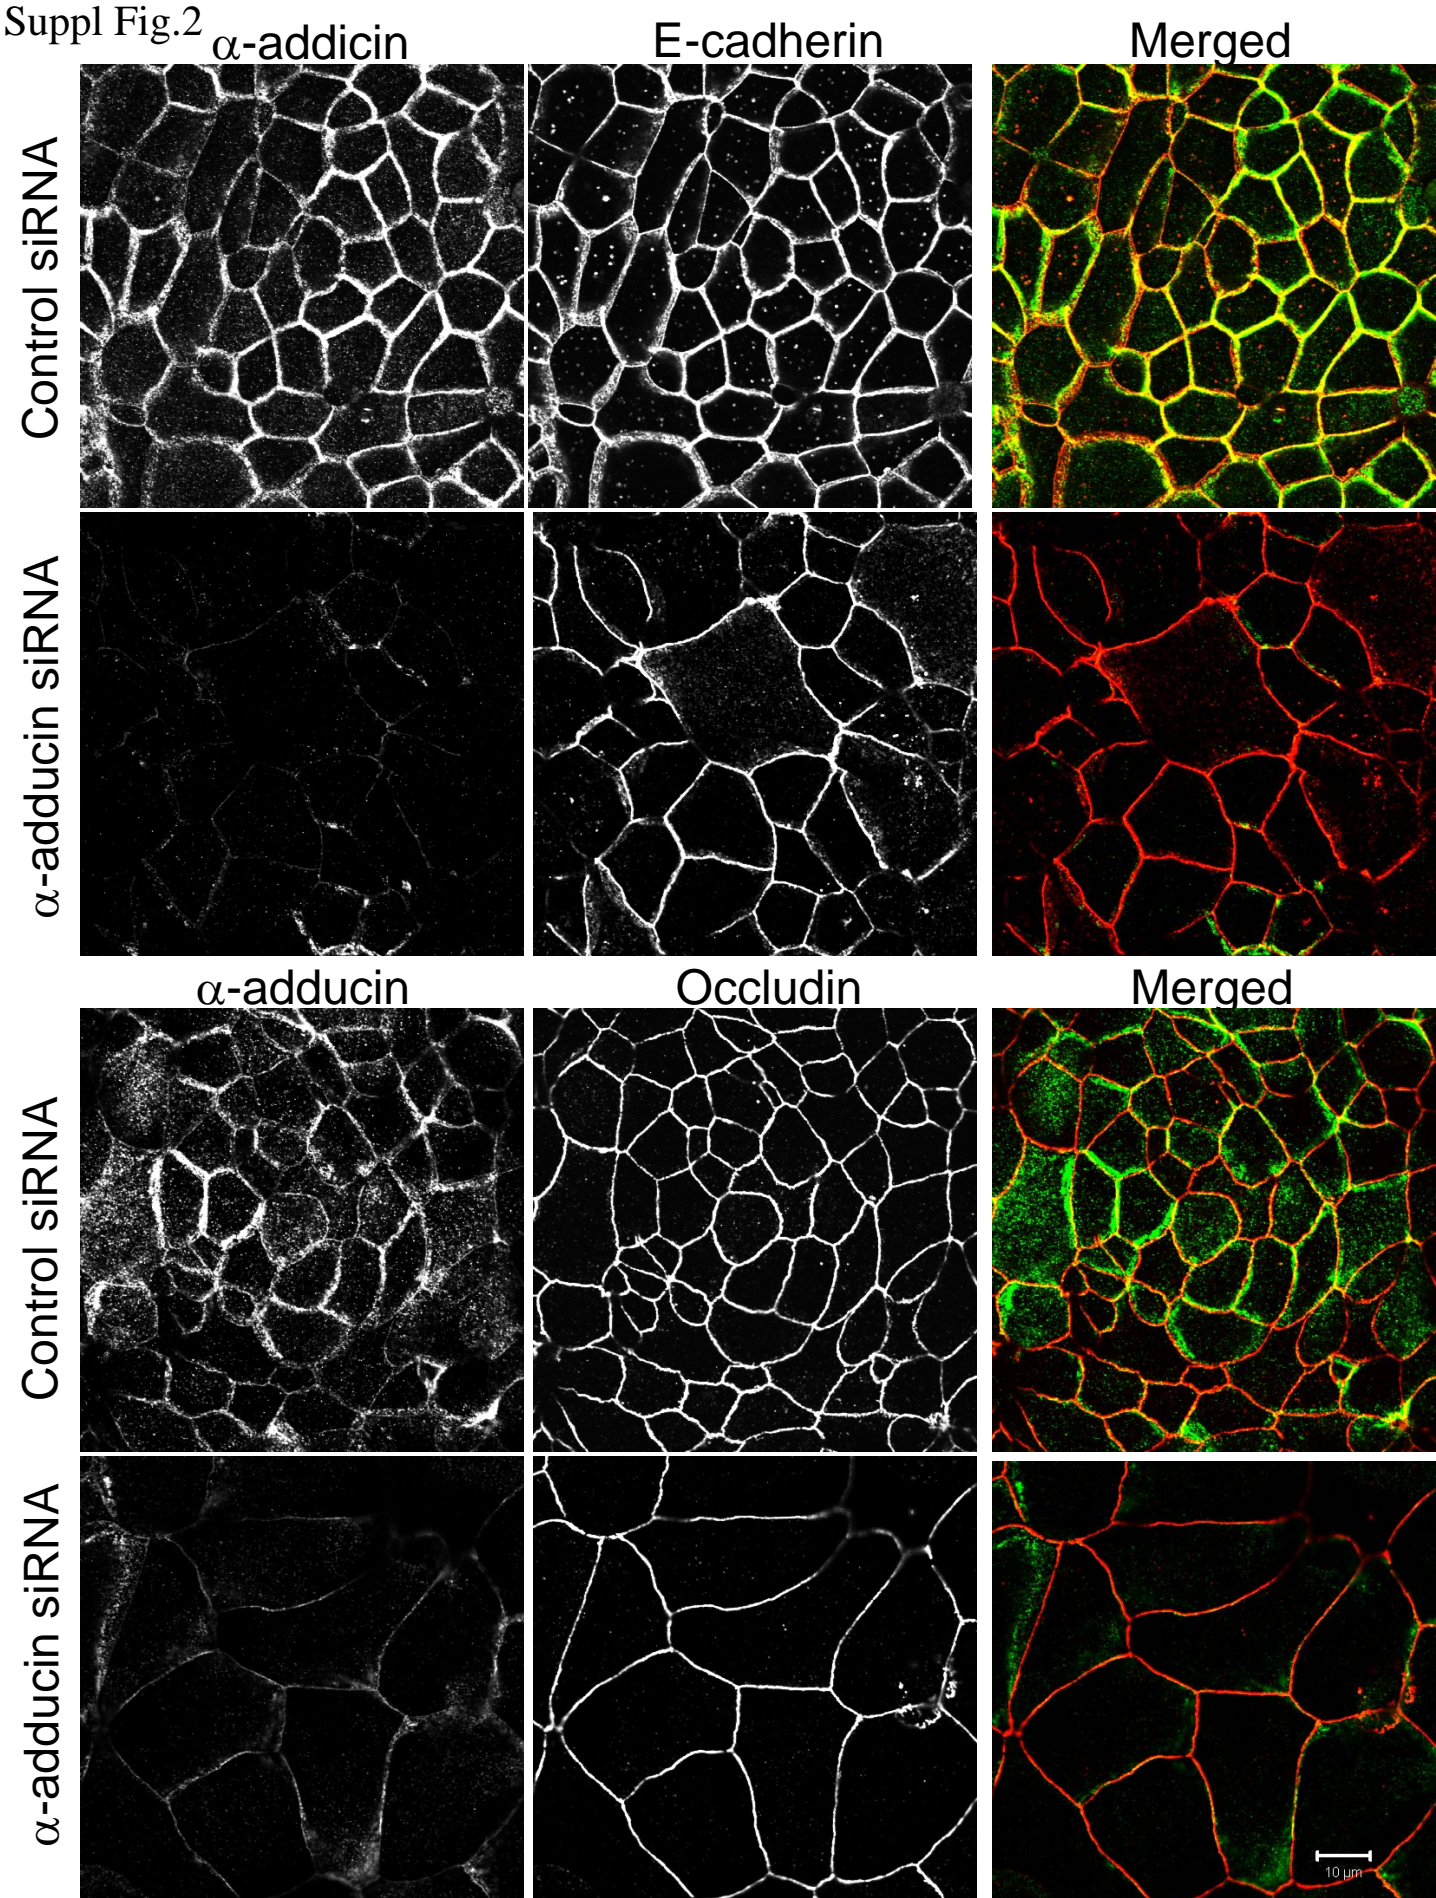



$\gamma$ -adducin

$\beta$ -catenin

Merged

Control siRNA

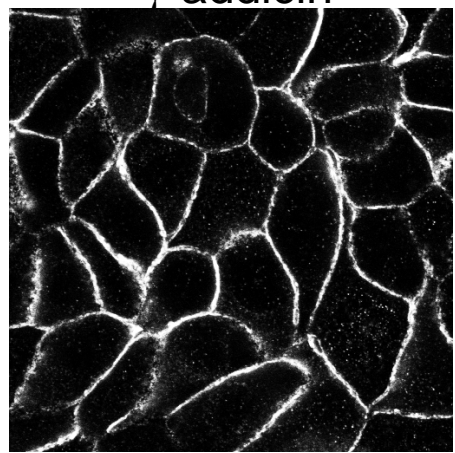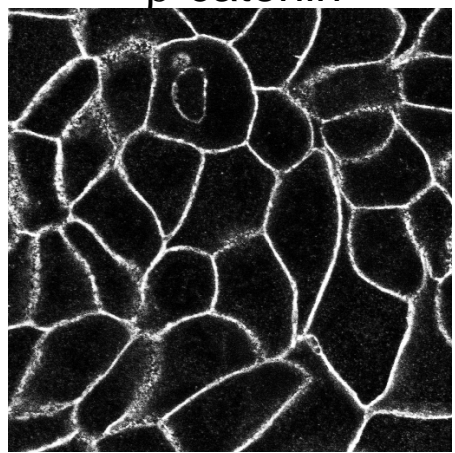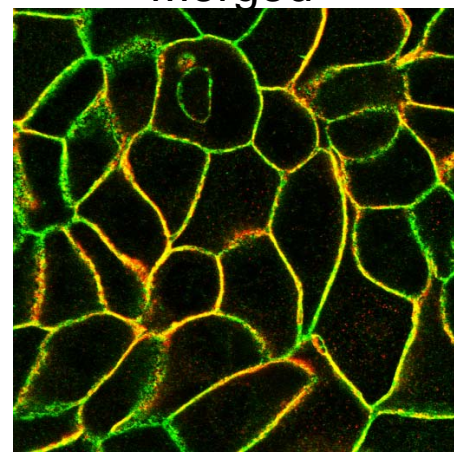

$\gamma$ -adducin siRNA

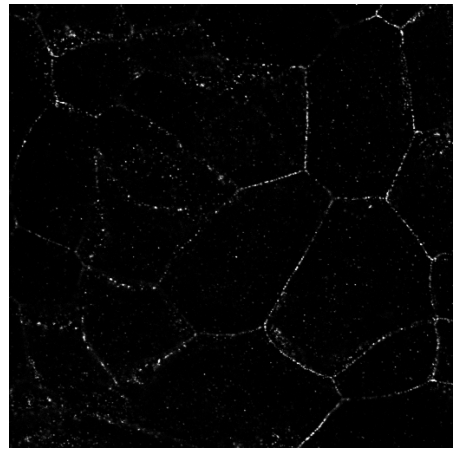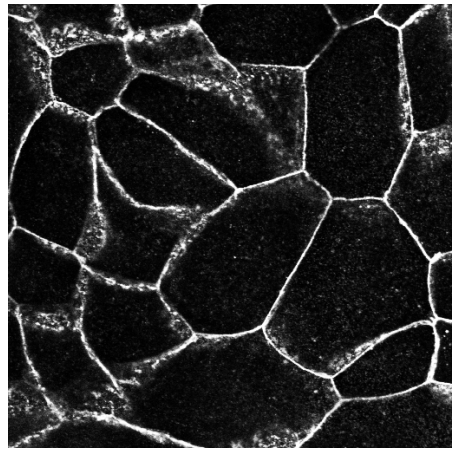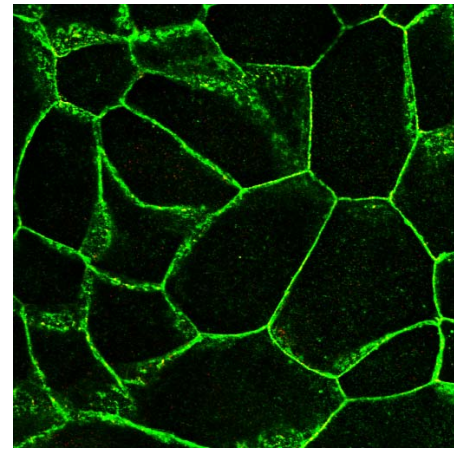

$\gamma$ -adducin

Occludin

Merged

Control siRNA

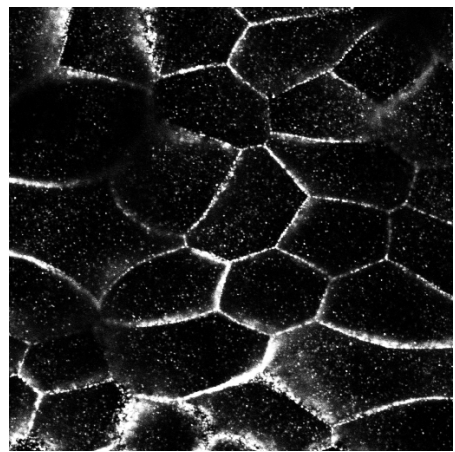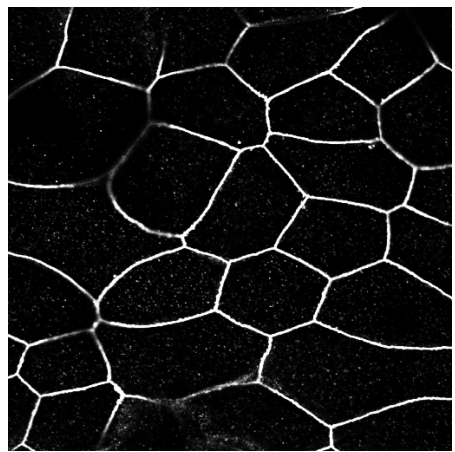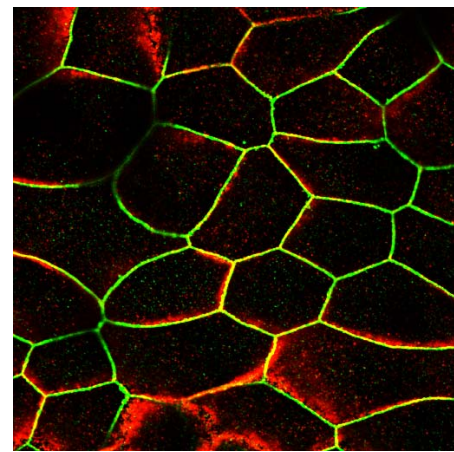

$\gamma$ -adducin siRNA

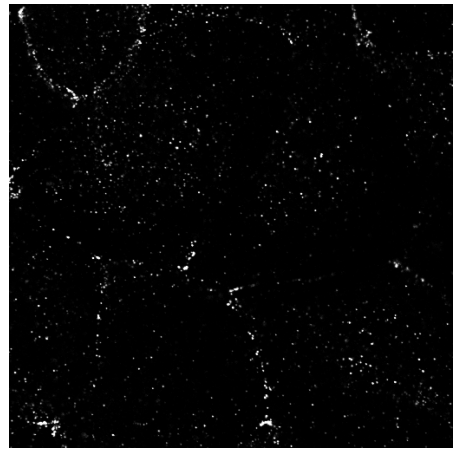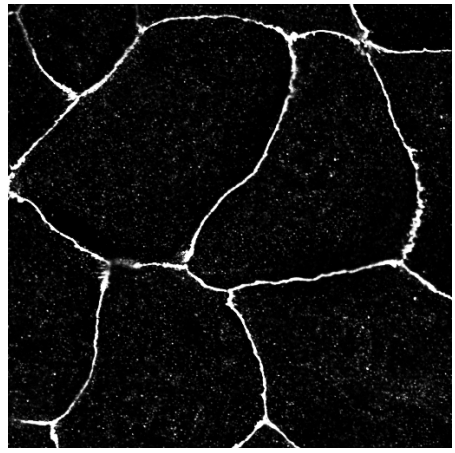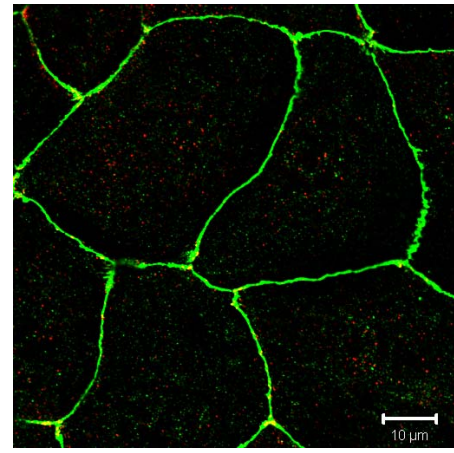

10  $\mu$ m

A

Control siRNA

 $\alpha$ -adducin siRNA $\alpha$ -Adducin/  
E-cadherin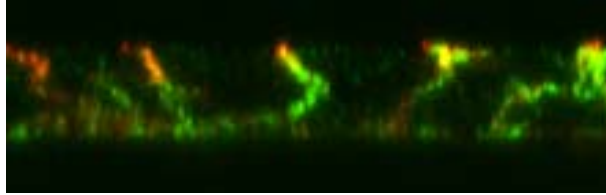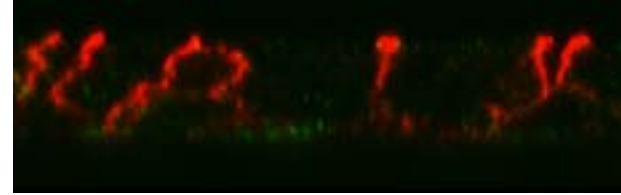

Control siRNA

 $\gamma$ -adducin siRNA $\gamma$ -Adducin/  
 $\beta$ -cadherin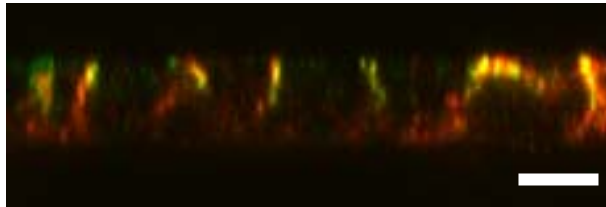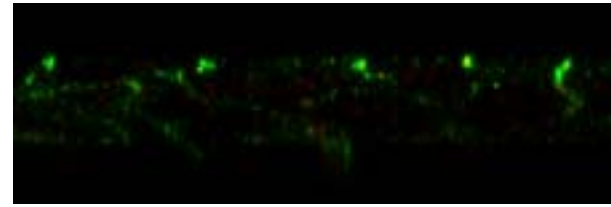

B

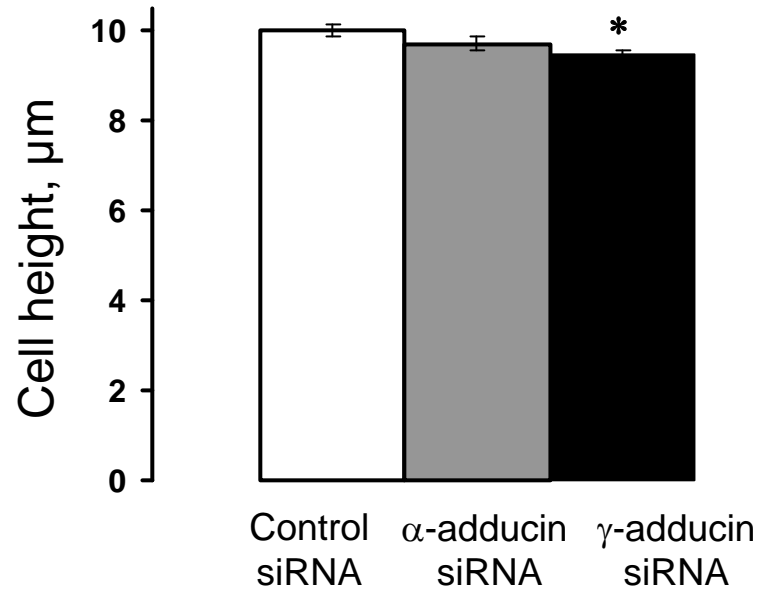



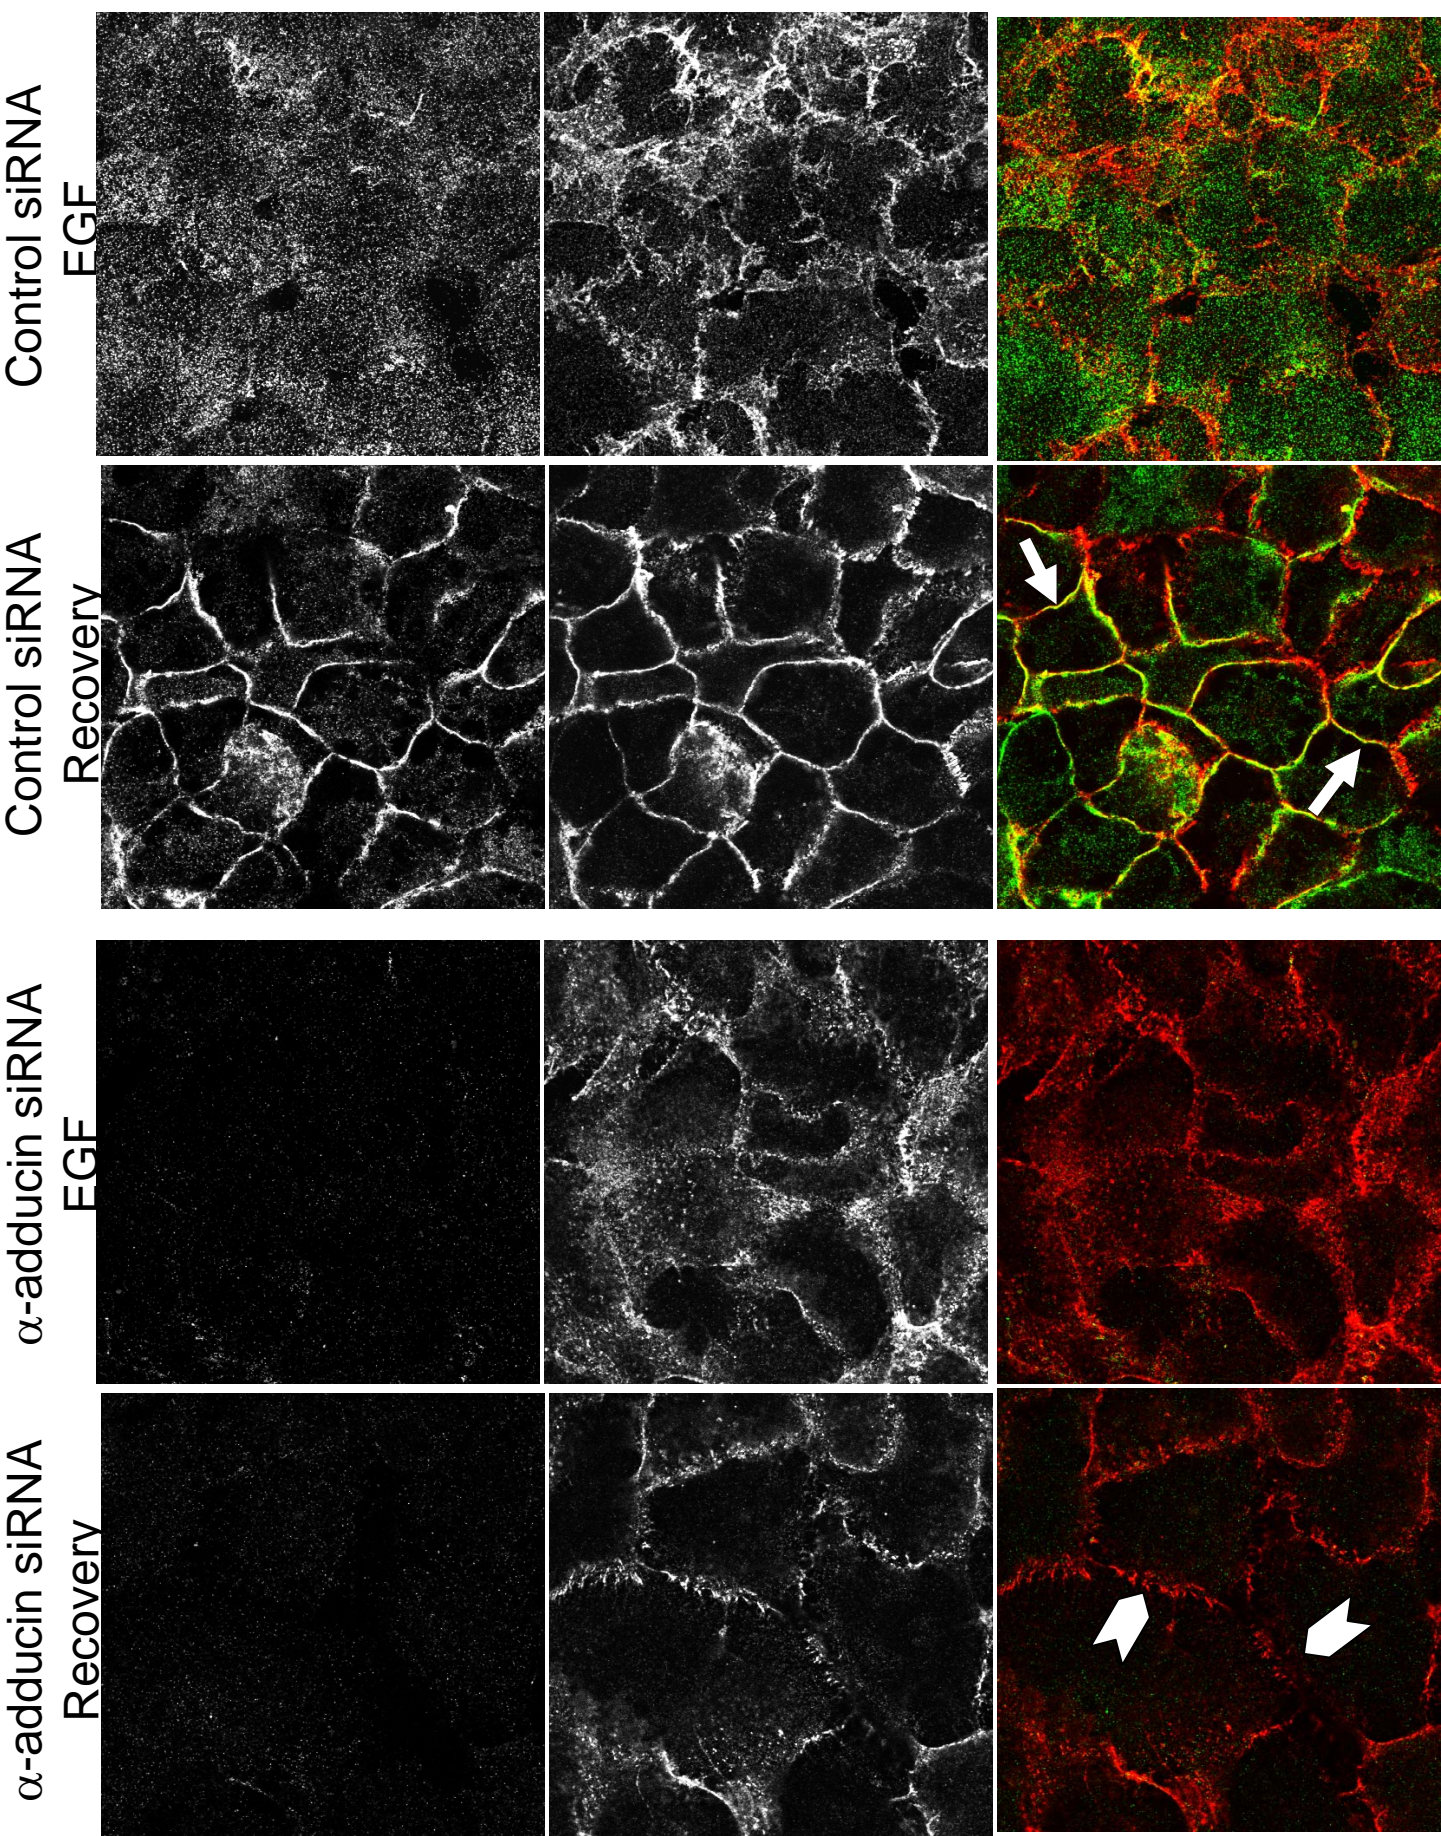



# A $\beta$ II-spectrin mRNA expression

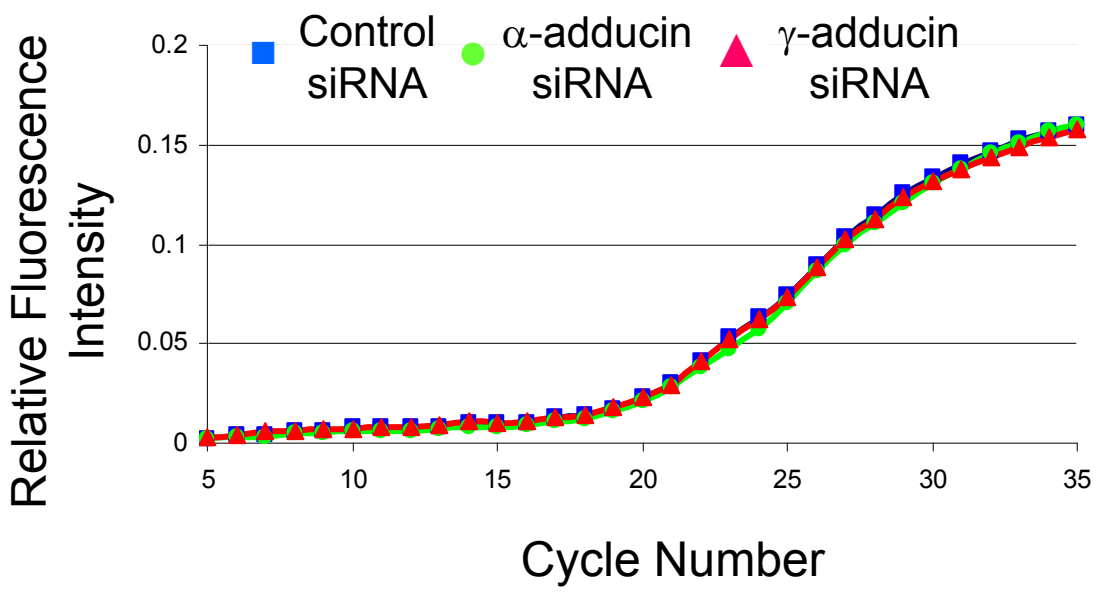

# B

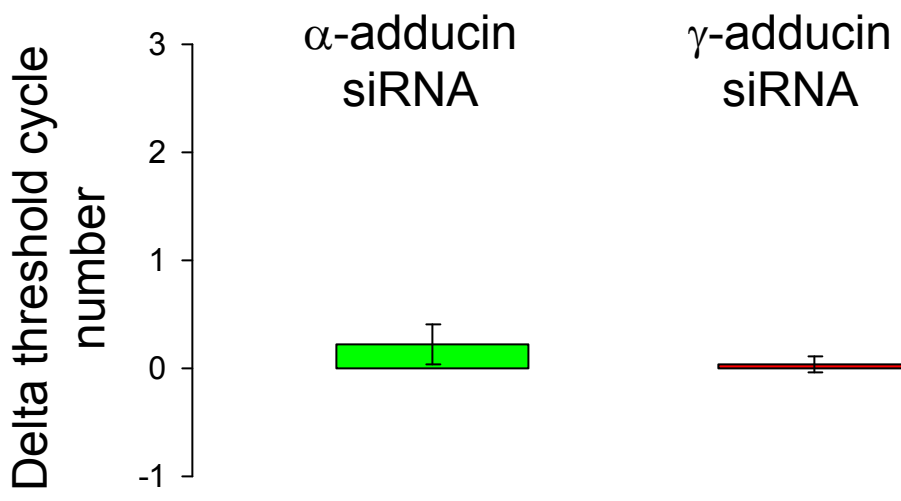



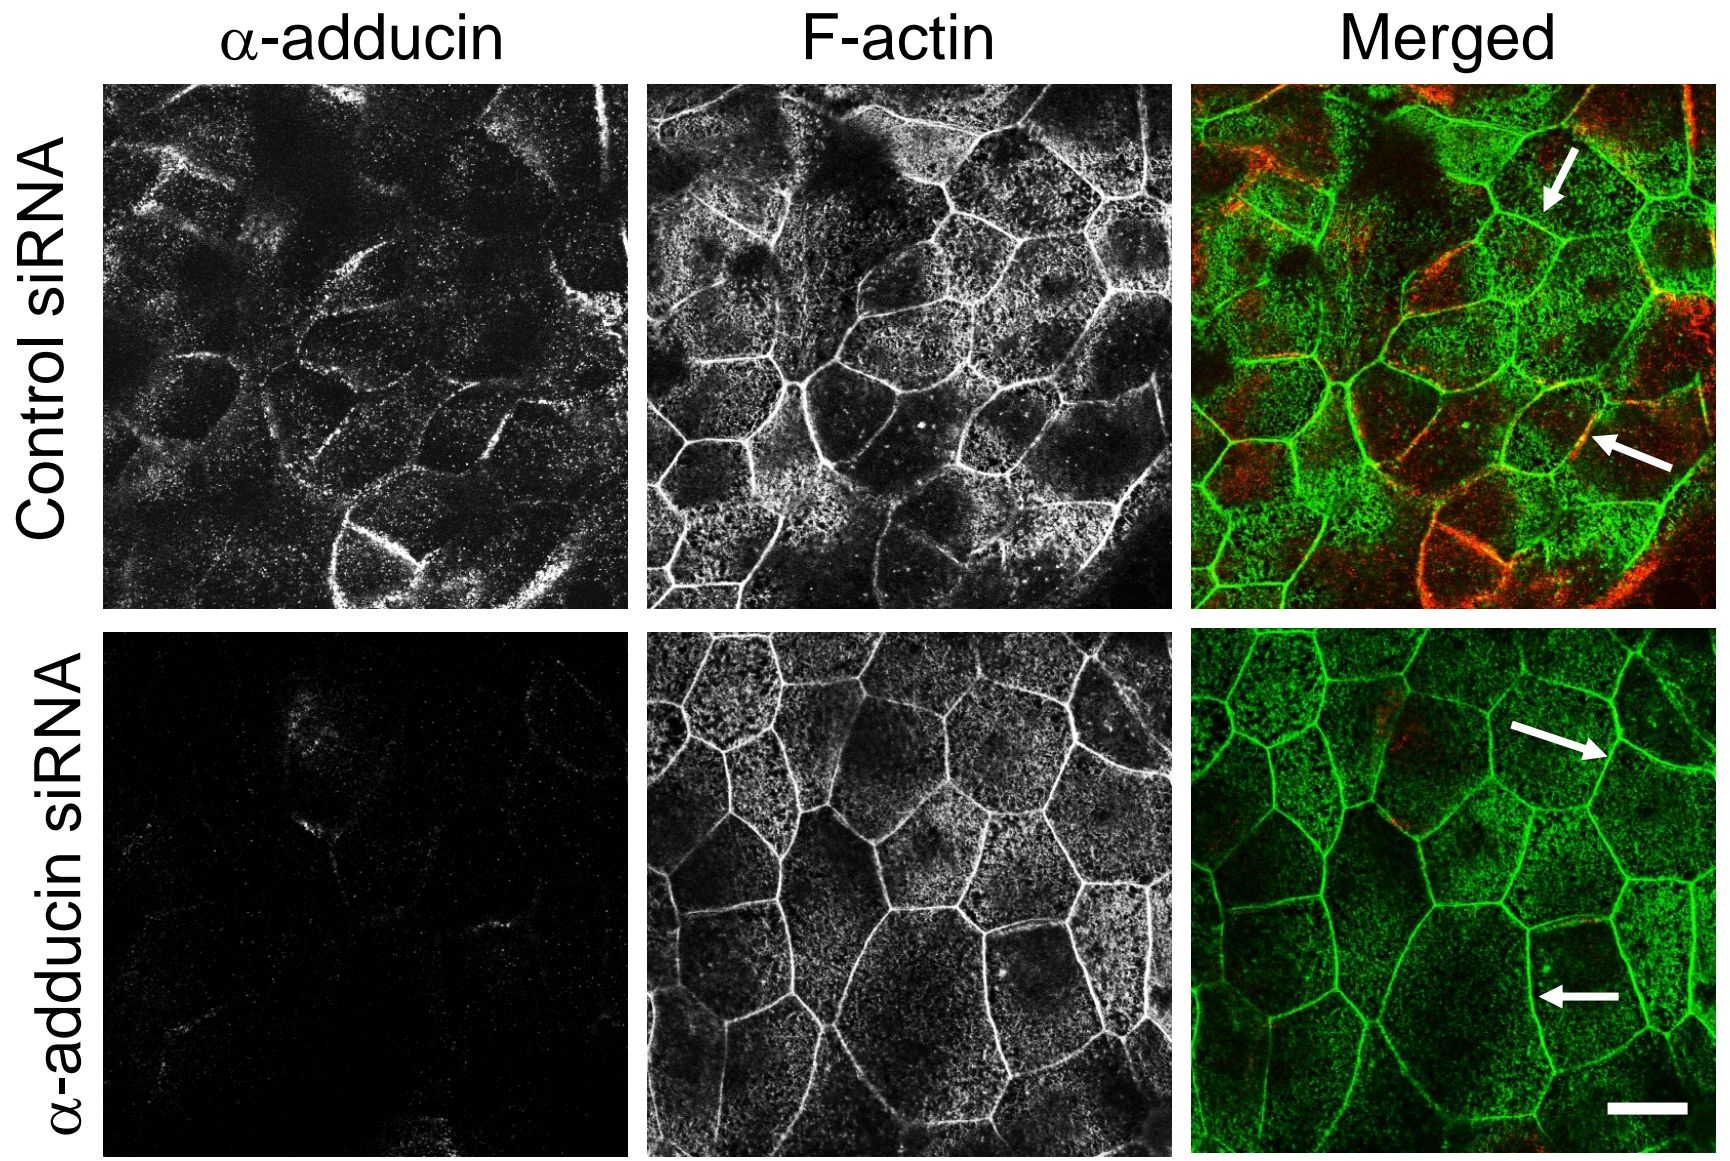

Supplement: E10-03-0259_1.pdf [file E10-03-0259_1.pdf]
